# Supplementary material for: Language influences in two-digit number processing across German and French
Source: Research Square preprint supplement (doi:10.21203/rs.3.rs-7991135/v1), 2025-11-06
Supplement: Supplementary file 1 [file 42104097a65f14941314a8c9.docx]

**Supplementary Method S1**

#### Appendix A: Abbreviated Math Anxiety Index – AMAS [18]

1. Having to use the tables in the back of a math book.
2. Thinking about an upcoming math test 1 day before.
3. Watching a teacher work an algebraic equation on the blackboard.
4. Taking an examination in a math course.
5. Being given a homework assignment of many difficult problems that is due the next class meeting.
6. Listening to a lecture in math class.
7. Listening to another student explain a math formula.
8. Being given a “pop” quiz in math class.
9. Starting a new chapter in a math book

#### Appendix B: Edingburgh Handedness Inventory – EHI (Oldfield, 1971)

Which hand do you prefer to use when:

1. Writing
2. Drawing
3. Throwing
4. Using scissors
5. Using a toothbrush
6. Using a knife (without a fork)
7. Using a spoon
8. Using a broom (upper hand)
9. Striking a match
10. Opening a box (holding the lid)
11. Holding a computer mouse
12. Using a key to unlock a door
13. Holding a hammer
14. Holding a brush or comb
15. Holding a cup while drinking

**Supplementary Table S2: Description of all 6 administered tasks**

| Domain | Task | Description |
| --- | --- | --- |
| Numerical | Single-digit magnitude comparison  (64 trials) | Participants chose the larger of two digits (1–9) shown on top of each other; digit distance and presentation frequency were controlled. |
| Two-digit magnitude comparison  (272 trials) | Participants chose the larger of two numbers (23–98), presented on top of each other; round decades and ties were excluded. |
| Dot comparison  (64 trials) | Participants chose the larger of two dot sets shown on top of each other. Six dot sizes were used; stimuli controlled for surface area and dot size distribution (adapted from Tricoche et al., 2023). |
| Language | Phonological  (64 trials) | Participants judged whether two simultaneously presented words rhymed. Words were presented in four conditions: similar orthography/similar phonology (e.g., dime–lime; similar orthography/different phonology (e.g. pint–mint), different orthography/similar phonology (e.g., jazz–has), and  different orthography/different phonology (e.g,. press–list). |
| Morpho-lexical  (64 trials) | Participants judged whether two word fragments formed an existing word. Items included morphologically correct words (e.g., depress) morphological violations (e.g., inpress) , real words, and pseudowords (adapted from Lochy et al., 2024). |
| Syntax  (64 trials) | Participants judged whether two words formed a correct phrase. Items included verb inflection (e.g., correct: I have, incorrect: I has) and both syntactic number agreement (e.g., two tables) and violations (e.g., two womans). |

**Supplementary Figure S3**


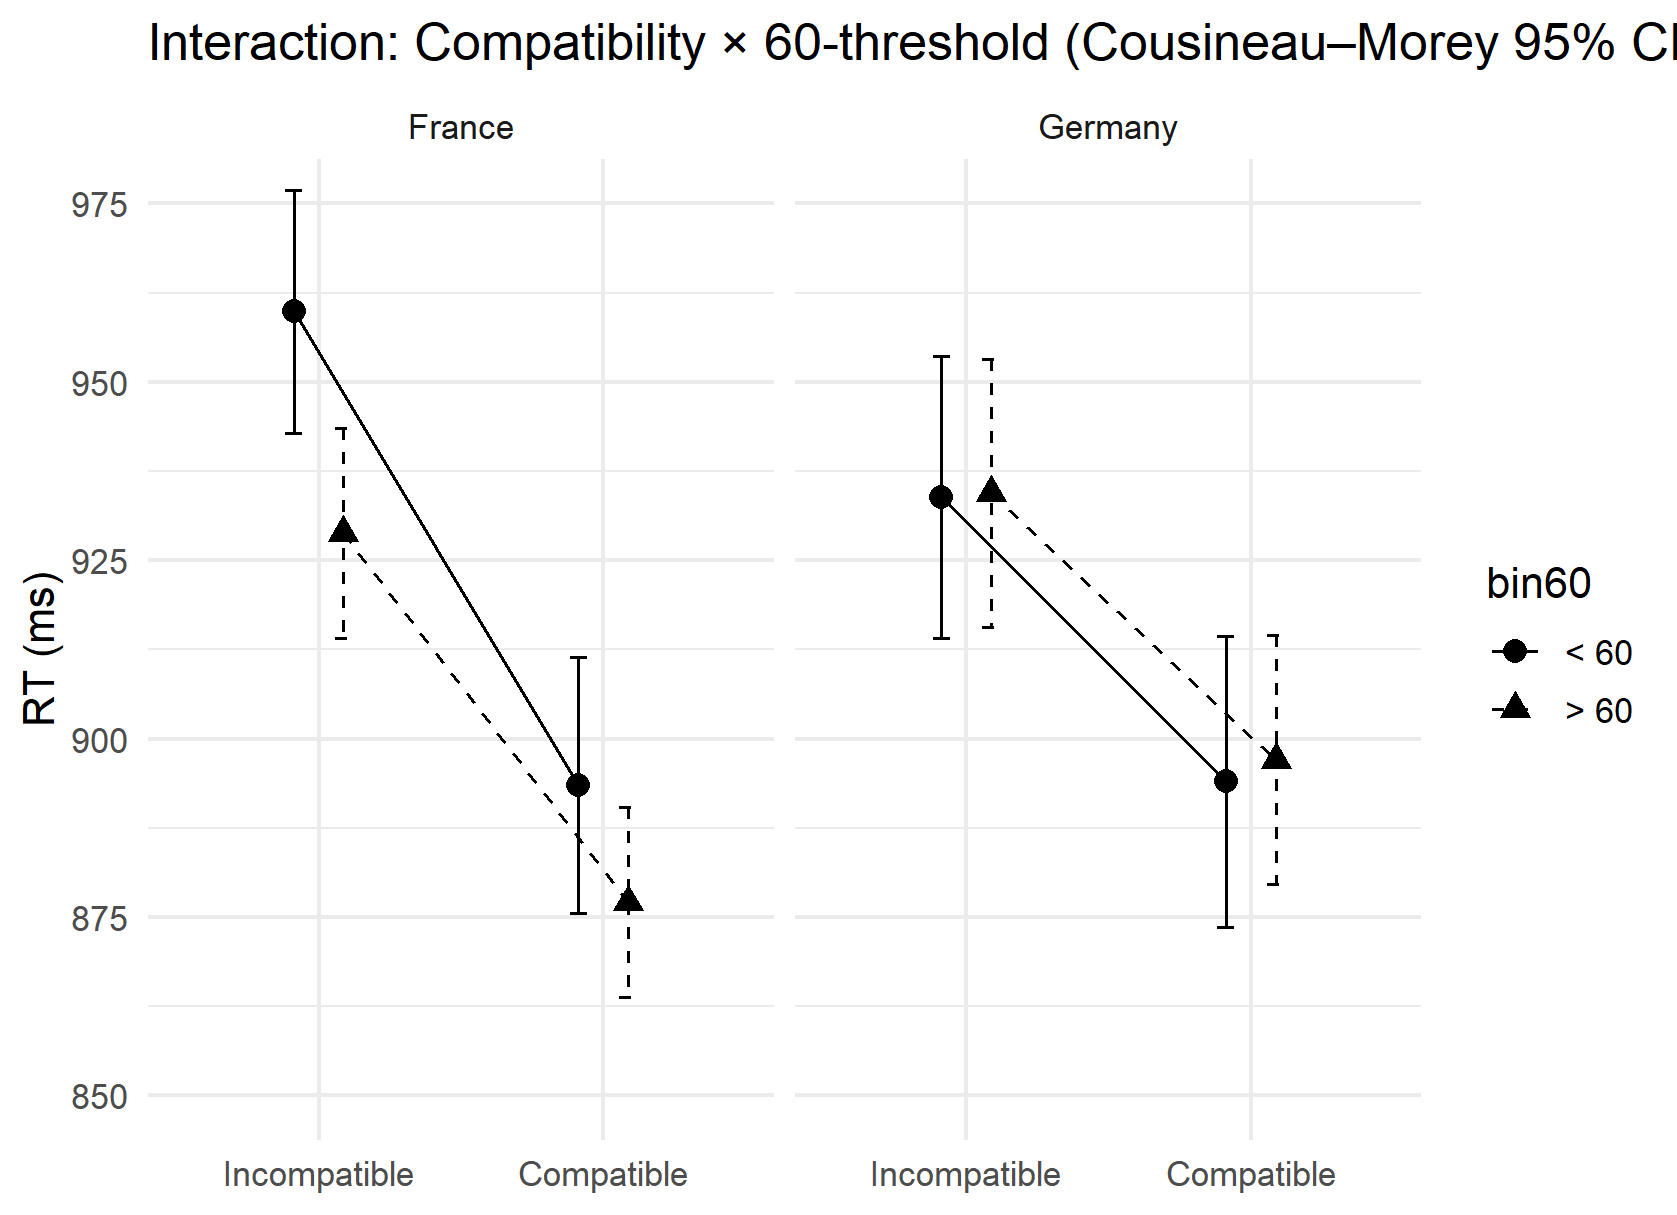


**Figure 2: Mean reaction times (in ms) for compatible and incompatible trials above and below 60 for both French and Germans speakers.**Mean reaction times are drawn as distinct lines and plotted separately for France (left) and Germany (right) with within-subject 95% confidence intervals (CIs, Cousineau–Morey [11,12]). The UDCE is visible as a clear compatibility benefit in both countries. Unlike Germans, French participants are slower in the <60 trials at both compatibility levels. Overlapping Cousineau–Morey-corrected CIs suggest that any threshold differences are small/uncertain, while the compatibility effect is pronounced in both panels.
